# Supplementary material
Source: PubMed Central journal article supplement (PMC3750070)
Supplement: NIHMS494281-supplement-01.pdf [file NIHMS494281-supplement-01.pdf]

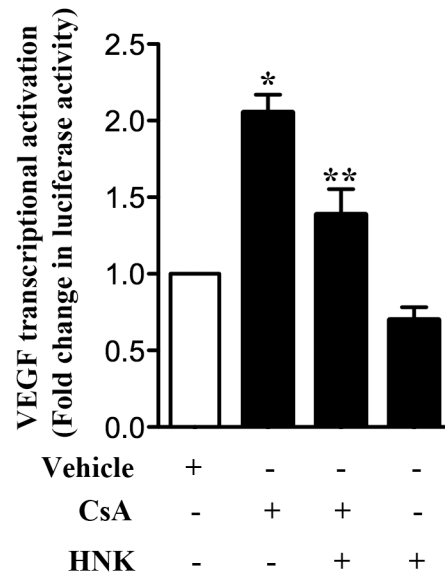

**Supplementary Figure-1**

**Caki-1 cells were transfected with VEGF promoter-luciferase construct (0.5  $\mu$ g) and treated with 5  $\mu$ g/ml CsA, 20  $\mu$ M honokiol (HNK) or vehicle. The cells were harvested 48 h after transfection and fold change in luciferase activity was calculated as the relative luciferase counts from each group of cells compared to that of vehicle-treated control. Results are representative of two independent experiments. Columns, average of triplicate readings; error bars, standard error of the mean (SEM). \* $p < 0.05$  compared with vehicle-treated control, and \*\* $p < 0.05$  compared with CsA-treated but HNK-untreated cells.**
