# Supplementary material
Source: PubMed Central journal article supplement (PMC3750070)
Supplement: NIHMS494281-supplement-02.pdf [file NIHMS494281-supplement-02.pdf]

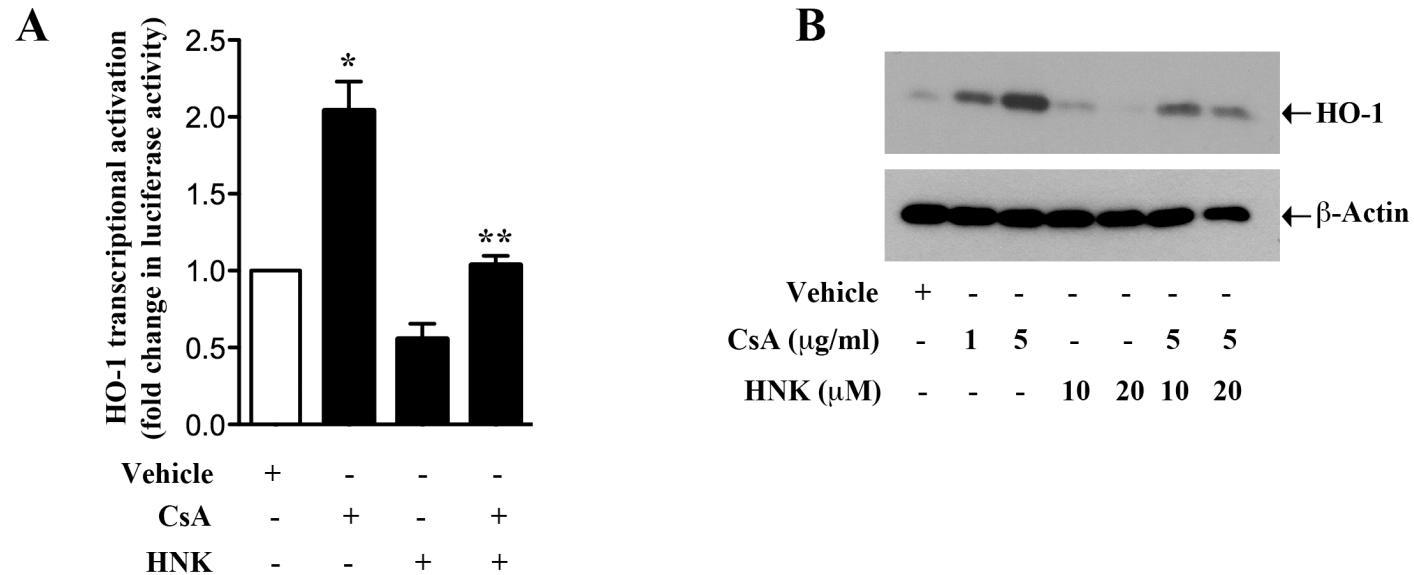

### Supplementary Figure-2

(A) Caki-1 cells were transfected with HO-1 promoter-luciferase construct (0.5  $\mu\text{g}$ ) and then treated with 5  $\mu\text{g/ml}$  CsA, 20  $\mu\text{M}$  honokiol (HNK) or vehicle. The cells were harvested 48 h after transfection and fold change in luciferase activity was calculated as the relative luciferase counts from each group of cells compared to that of vehicle-treated control. Results are representative of two independent experiments. Columns, average of triplicate readings from two different samples; error bars, standard error of the mean (SEM). \* $p < 0.05$  compared with vehicle-treated control, and \*\* $p < 0.05$  compared with CsA-treated but HNK-untreated cells. (B) 786-0 cells were treated with different combinations of 1-5  $\mu\text{g/ml}$  CsA, 10-20  $\mu\text{M}$  honokiol (HNK) or vehicle for 24 h. The cells were lysed and the expression of HO-1 and  $\beta$ -actin was analyzed by Western blot. Data shown are representative of two independent experiments.
